# Supplementary material for: Design and preliminary implementation of onsite electrochemical wastewater treatment and recycling toilets for the developing world
Source: Royal Society of Chemistry journal article supplement (doi:10.1039/c8ew00209f), 2018-01-01
Supplement: c8ew00209f1.pdf [file c8ew00209f1.pdf]

1  
2  
3  
4  
5  
6  
7  
8  
9  
10  
11  
12  
13  
14  
15  
16  
17  
18  
19  
20

**Supporting information**

**Design and preliminary implementation of onsite  
electrochemical wastewater treatment and recycling  
toilets for the developing world**

Clément A. Cid<sup>1</sup>, Yan Qu<sup>1</sup>, and Michael R. Hoffmann\*<sup>1</sup>

<sup>1</sup>Linde-Robinson Laboratories, California Institute of Technology,  
1200 E California Blvd, Pasadena, CA 91125

<sup>2</sup>Trussell Technologies Incorporation,  
232 N Lake Ave., Suite 300, Pasadena, California, 91101, USA

Number of pages: 12 (including this cover page)

Number of figures: 8

Number of tables: 1



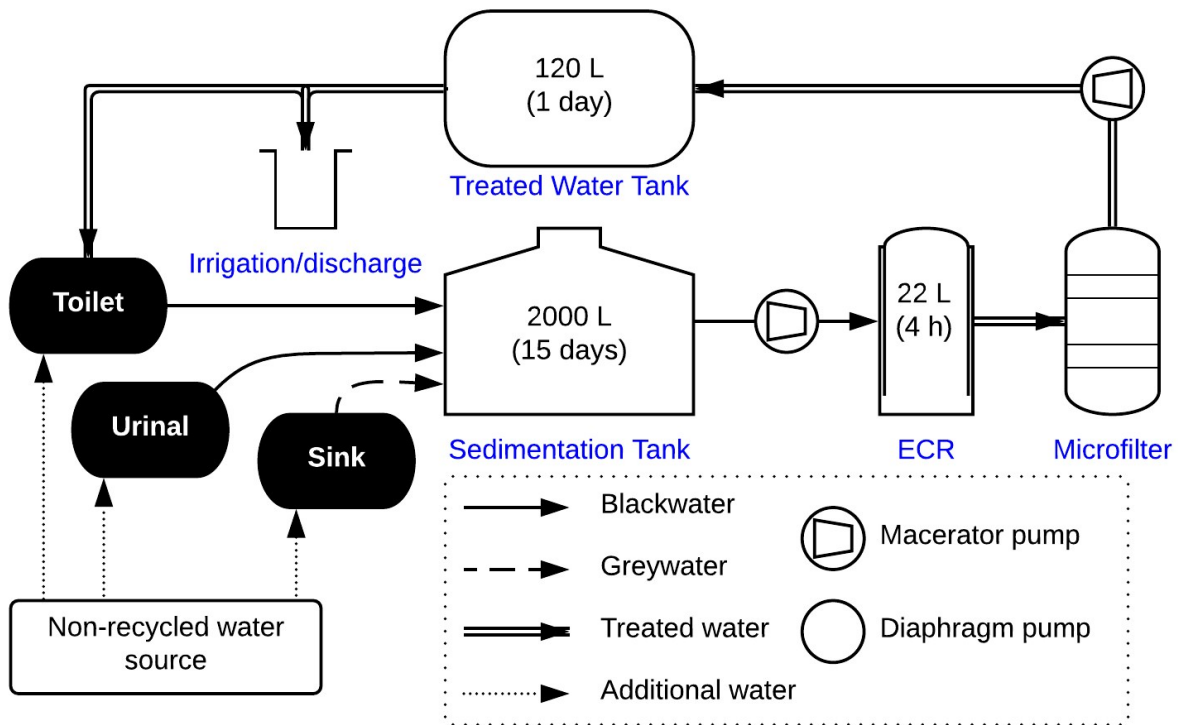

27

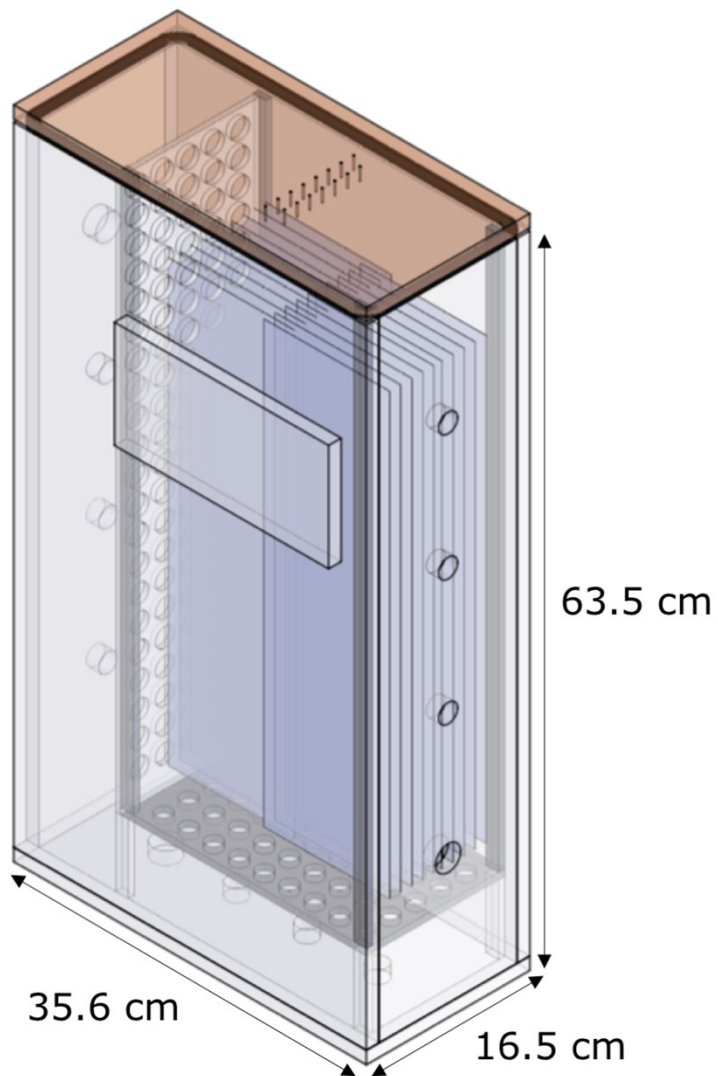

28

29 **Figure S2: CAD rendering of the electrochemical reactor (ECR) body with an artist**  
30 **view of the electrode array in its core. Dimensions of the outer shell are given as**  
31 **reference.**

32

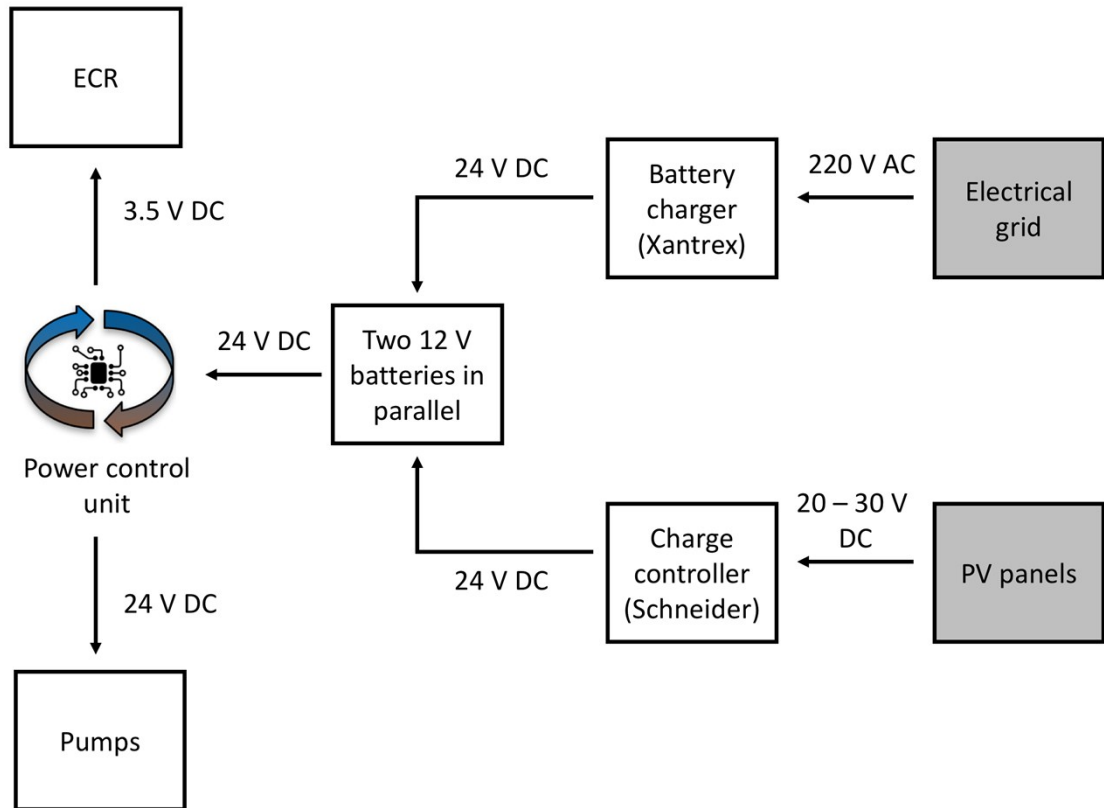

33

34 **Figure S3: Simplified electrical energy flow diagram of the Caltech Solar Toilet.**

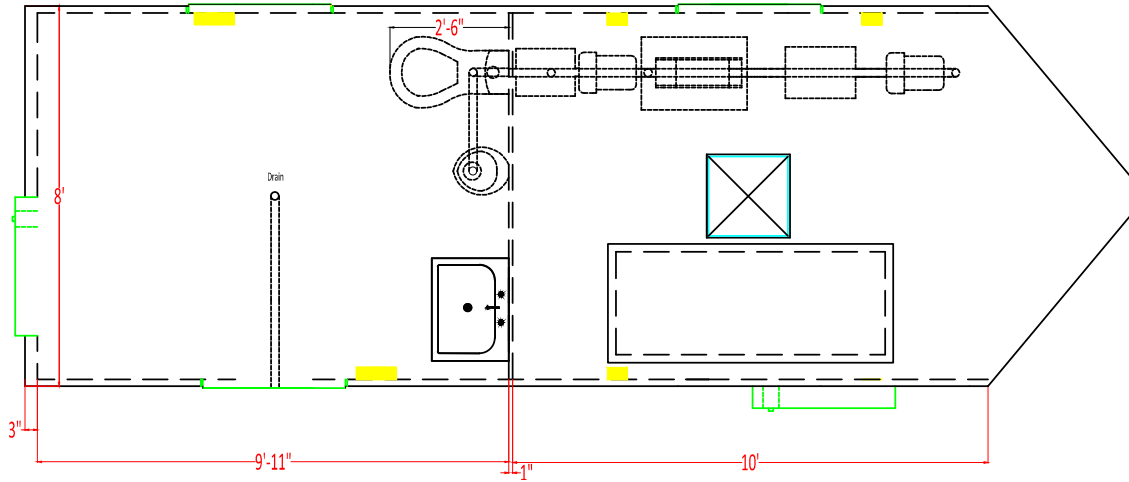

35

36 **Figure S4: Typical layouts of the self-contained electrochemical treatment**  
 37 **systems with a dedicated bathroom located on the left side and a treatment room**  
 38 **on the right side.**

39

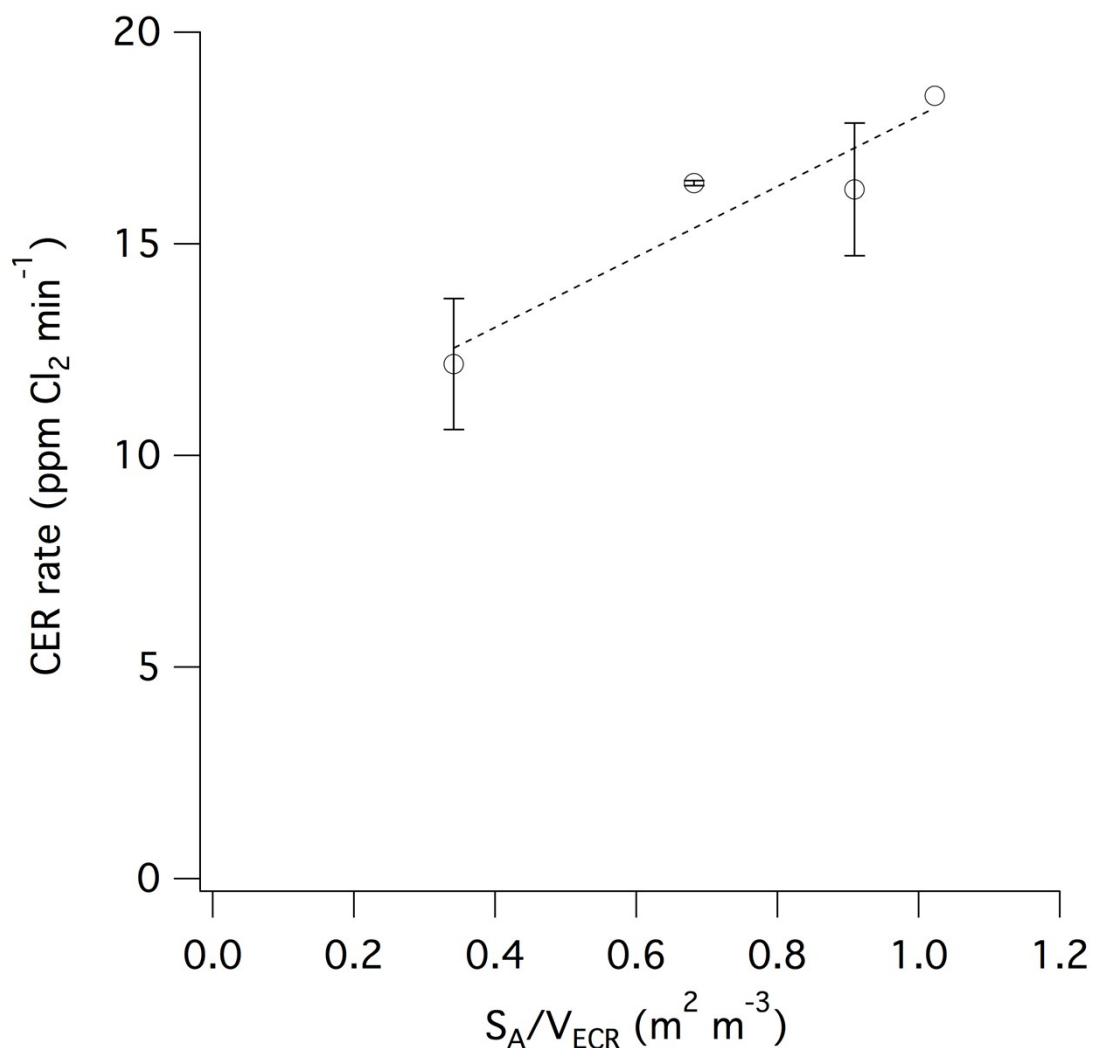

40

41 **Figure S5: Measured CER rate (ppm Cl<sub>2</sub> min<sup>-1</sup>) at 3.5 V in 22 L of 20 mM NaCl**  
42 **solution as a function of anodes surface area (S<sub>A</sub>, m<sup>2</sup>) to reactor active volume**  
43 **(V<sub>ECR</sub>, m<sup>3</sup>). Linear regression equation: CER = 8.3 · (S<sub>A</sub>/V<sub>ECR</sub>) + 9.7 (R<sup>2</sup> = 0.89). Error**  
44 **bars represent ± one standard deviation of 3 replicates except for the data point**  
45 **with highest S<sub>A</sub>/V<sub>ECR</sub>.**

46

47

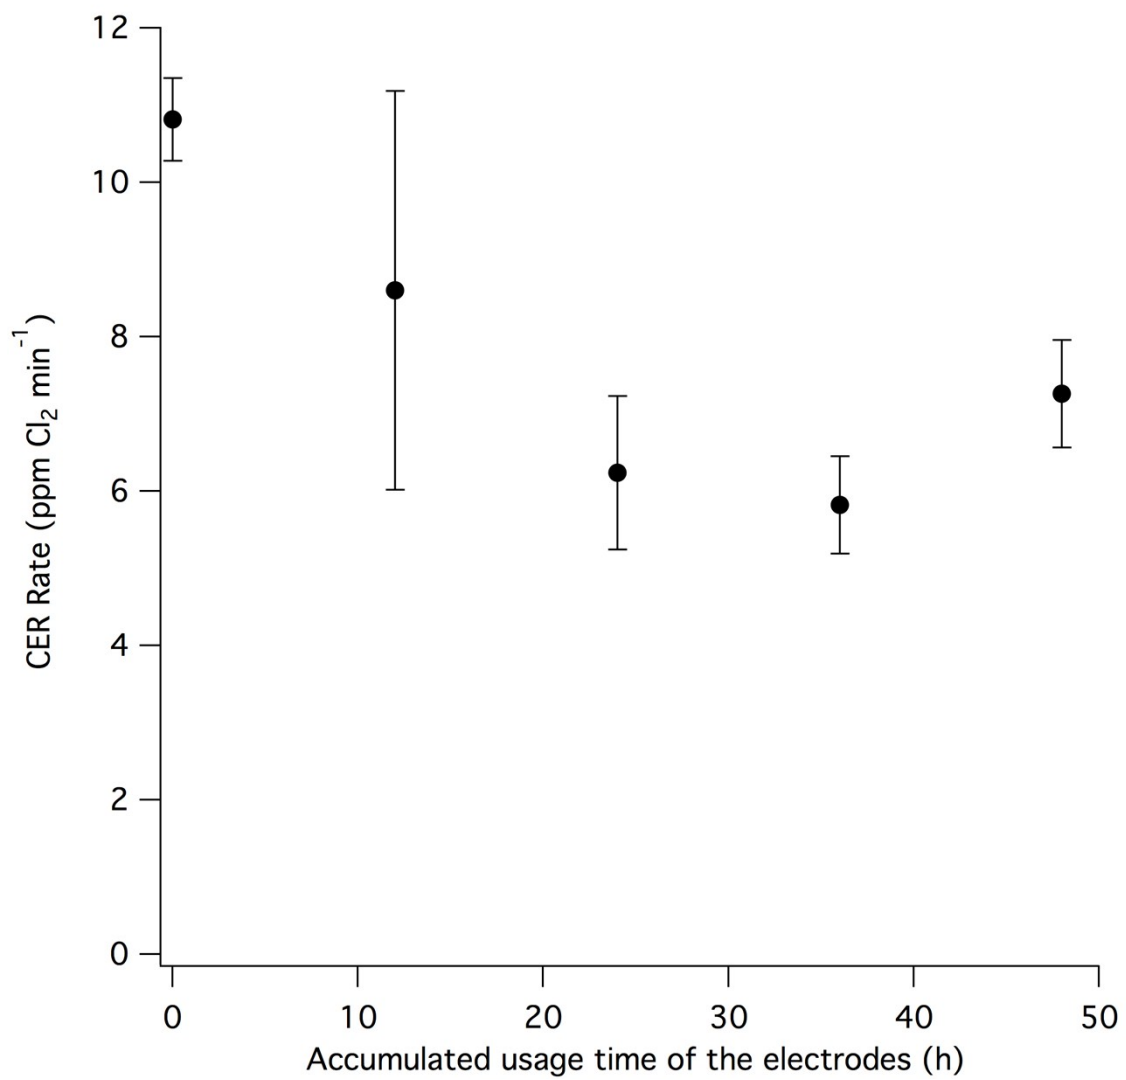

48

49 **Figure S6: CER rate determined with 20 mM NaCl solution in water after usage of**  
50 **the electrodes for toilet wastewater treatment in PAS unit.**

51



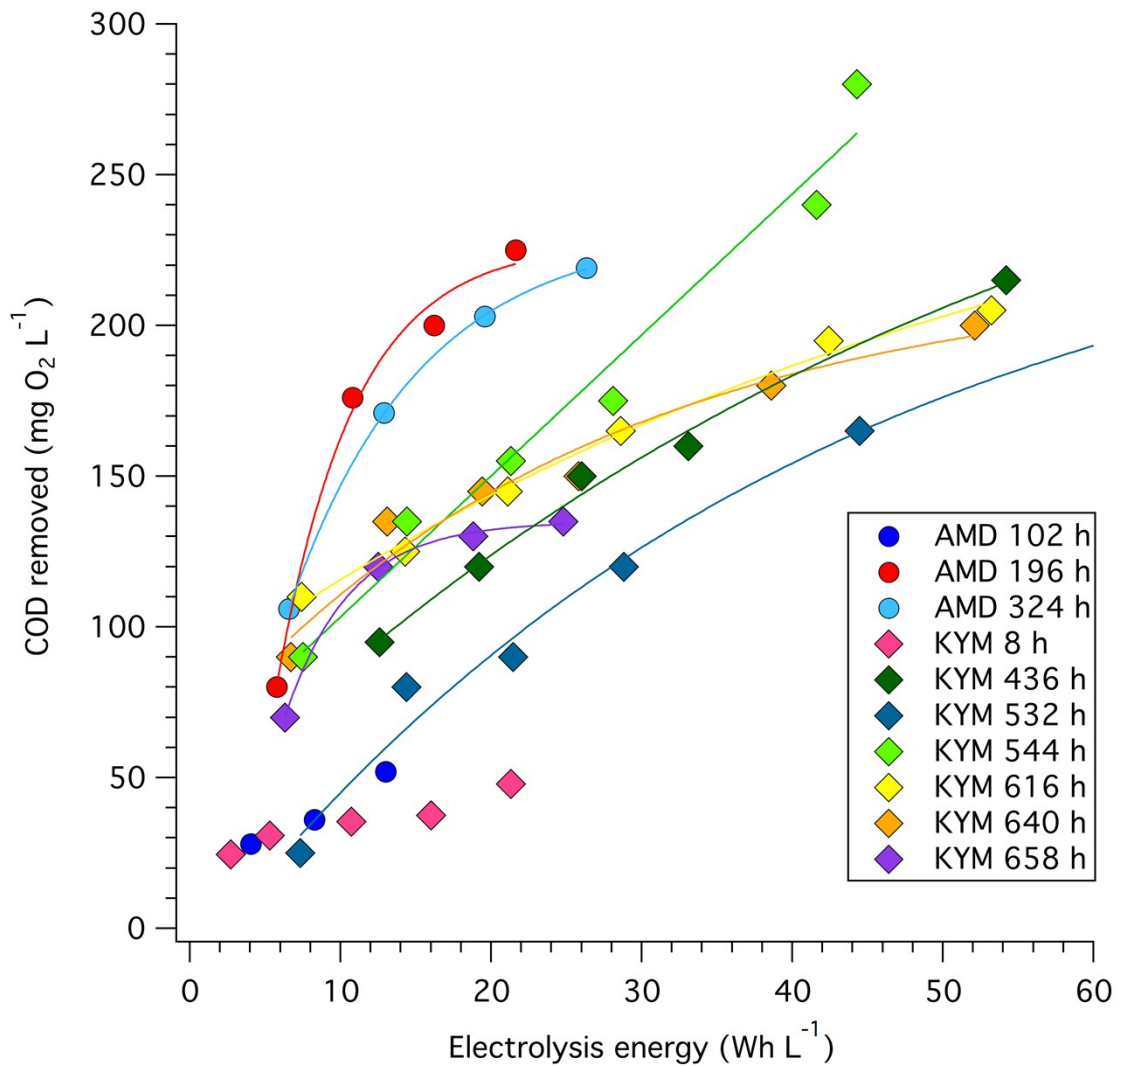

52

53 **Figure S7: COD removed per Wh L<sup>-1</sup> during a treatment cycle (4 h to 6 h) after**  
 54 **specific accumulated toilet wastewater electrolysis time for prototypes AMD and**  
 55 **KYM.**

56

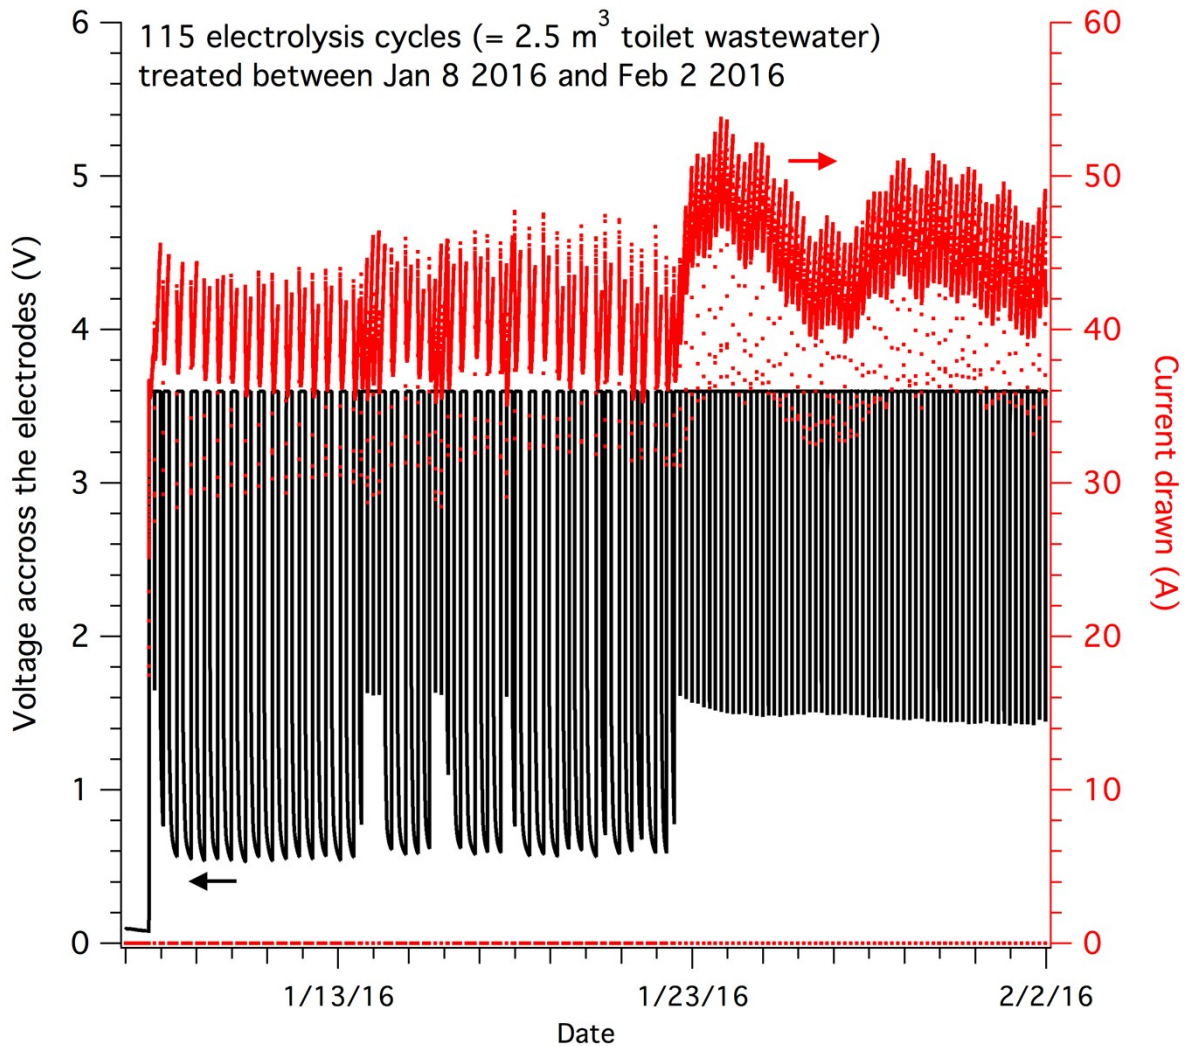

57

58 **Figure S8: Recorded electrolysis voltage and current of the ECR during a typical**  
 59 **month of full usage of AMD prototype. Variations in cycles are due to ECR turning**  
 60 **off and on following the automation mechanism Figure 3. The overall increase in**  
 61 **current drawn after 01/23/2016 can be attributed to a higher concentration of**  
 62 **Cl<sup>-</sup> in the wastewater due to recycled treated water being used for flushing. The**  
 63 **additional urine of the users of the toilet increases the quantity of Cl<sup>-</sup> in the**  
 64 **system. (see Table 4).**

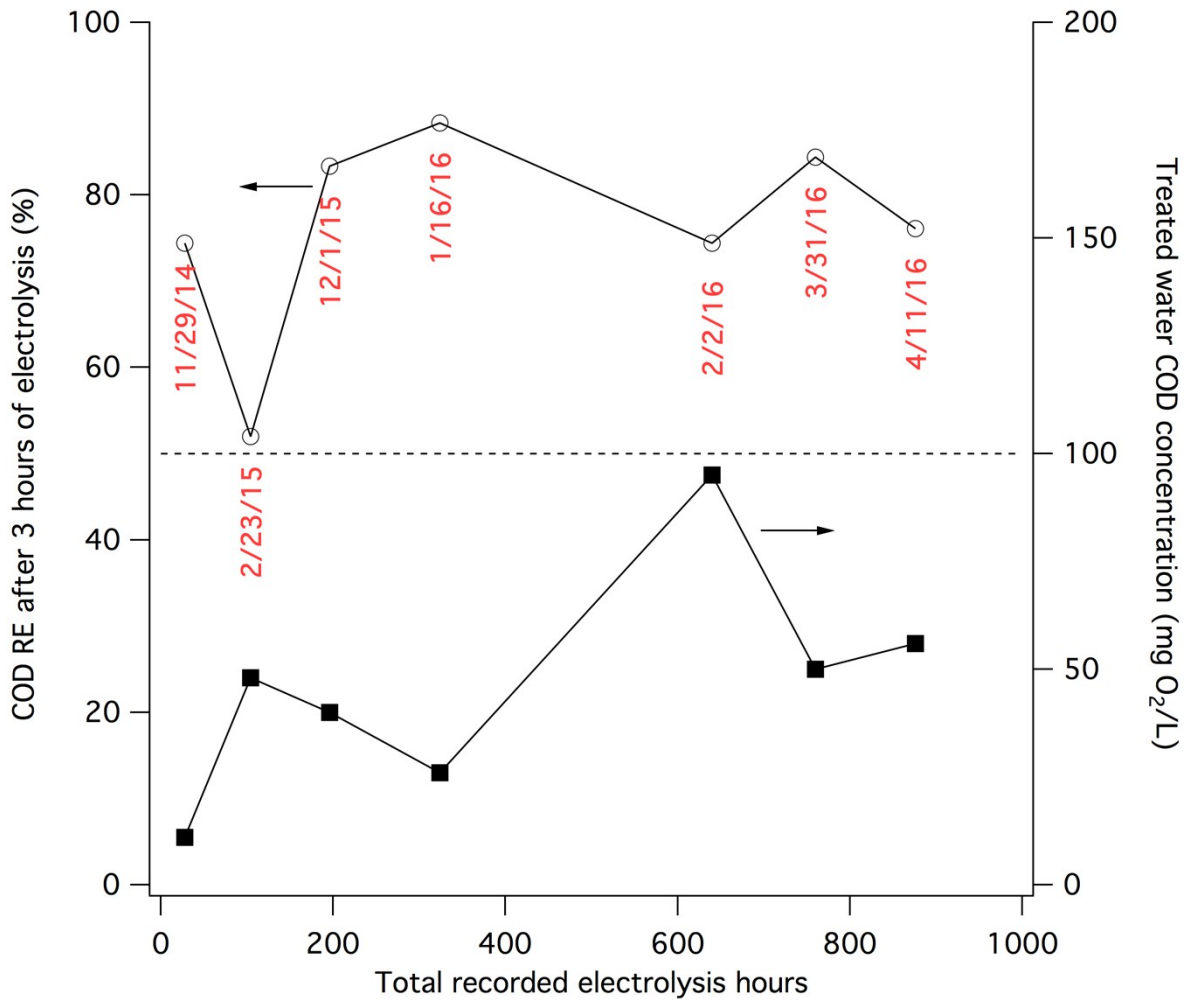

65

66 **Figure S9: COD removal efficiency (RE) and output COD value of treated toilet**

67 **wastewater of AMD prototype. Effective sampling dates are written vertically.**

68

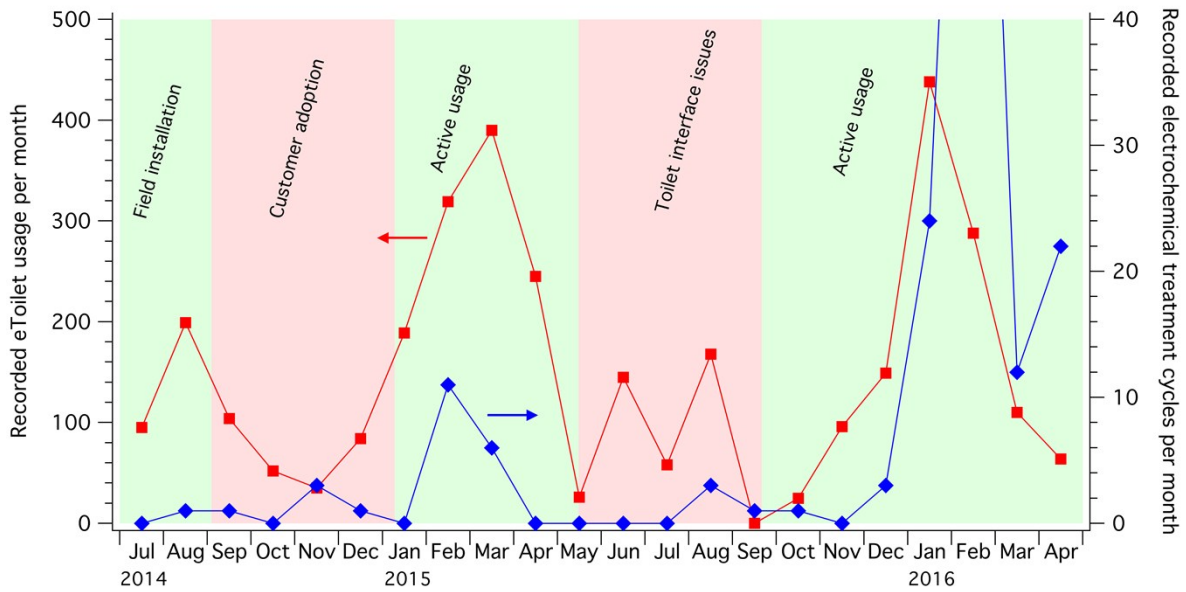

69

70 **Figure S10: Recorded monthly usage of eToilet (red squares, left) and number of**  
 71 **electrolysis treatment cycles per month (blue rhombi, right) during operation**  
 72 **of the AMD unit.**

73

74 **Supplementary table**

75

76 **Table S1: Coefficients obtained by computational fit obtained by Igor Pro 6.37**  
 77 **(Wavemetrics) with equation (S1) of the COD removal data measured after the**  
 78 **specific accumulated electrolysis times (Figure S7).  $\sigma_0$ ,  $\sigma_1$ , and  $\sigma_2$  correspond to  $\pm$**   
 79 **one standard deviation of  $C_0$ ,  $C_1$ , and  $C_2$  respectively.**

| <b>Accumulated<br/>Electrolysis<br/>Time (h)</b> | <b><math>C_0</math></b> | <b><math>C_1</math></b> | <b><math>C_2</math></b> | <b><math>A_0</math></b> | <b><math>\sigma_0</math></b> | <b><math>\sigma_1</math></b> | <b><math>\sigma_2</math></b> |
|--------------------------------------------------|-------------------------|-------------------------|-------------------------|-------------------------|------------------------------|------------------------------|------------------------------|
| <b>196</b>                                       | 227                     | -147                    | 5.16                    | 5.77                    | 14.4                         | 16.5                         | 1.58                         |
| <b>324</b>                                       | 232                     | -126                    | 8.75                    | 6.56                    | 1.27                         | 1.29                         | 0.22                         |
| <b>344</b>                                       | 188                     | -78.3                   | 7.82                    | 5.27                    | -                            | -                            | -                            |
| <b>436</b>                                       | 320                     | -224                    | 55.2                    | 12.6                    | 83.7                         | 81                           | 29.6                         |
| <b>532</b>                                       | 255                     | -224                    | 40.7                    | 7.33                    | 48.3                         | 44.9                         | 15.6                         |
| <b>544</b>                                       | 3.03E+05                | -3.02E+05               | 6.46E+04                | 7.50                    | 3.23E+08                     | 3.23E+08                     | 6.9E+07                      |
| <b>616</b>                                       | 286                     | -178                    | 55.5                    | 7.40                    | 47.5                         | 45.7                         | 21.8                         |
| <b>640</b>                                       | 218                     | -122                    | 26.4                    | 6.70                    | 30.6                         | 28.2                         | 13.5                         |
| <b>658</b>                                       | 135                     | -64.9                   | 4.32                    | 6.30                    | 1.79                         | 2.43                         | 0.49                         |

80

81  $COD (removed) = C_0 + C_1 \exp(- (x - A_0)/A_2)$  (S1)

82
